# Supplementary material
Source: PubMed Central journal article supplement (PMC1308314)
Supplement: 3-embor010-s1.pdf [file 3-embor010-s1.pdf]

*k*

*k*

*K*

*K*

*P*

*P*

*P*

$\alpha$

$\beta$

$\alpha$

$\beta$

$\alpha \quad \beta$

*i.e.*

*k*

*K k k K k k*

*i.e.*

*i.e.*

*K*

*et al.*

*K*

*k*

*k*

*k*

*k*

*P P '*

*P*

$\times$

$\times K$

*P '*

$\times \times K$

*i.e.*

$\times$

$\times$

*P*

*et al.*

*et al.*

*et al.*

*et al.*

*et al.*
